# Supplementary material for: Freestanding Activated Carbon Nanocomposite Electrodes for Capacitive Deionization of Water
Source: MDPI journal article supplement (doi:10.3390/polym14142891), 2022-07-16
Supplement: s1 [file s1]

**Supplementary:**

**Free standing Activated Carbon nanocomposite electrodes for Capacitive  
Deionization of water**

**Humair Hussain,<sup>1,2</sup> Asim Jilani,<sup>1</sup> Numan Salah,<sup>1</sup> Ahmed Alshahrie,<sup>1,2</sup> Adnan Memic,<sup>1</sup>  
Mohammad Omaish Ansari,<sup>1</sup> Joydeep Dutta<sup>1,3</sup>**

<sup>1</sup> Center of Nanotechnology, King Abdulaziz University, Jeddah 21589, Saudi Arabia.

<sup>2</sup> Physics Department, Faculty of Science, King Abdulaziz University, Jeddah 21589, Saudi Arabia.

<sup>3</sup> Functional Materials Group, Applied Physics Department, School of Engineering Sciences, KTH Royal Institute of Technology, AlbaNova universitetscentrum, 106 91 Stockholm, Sweden.

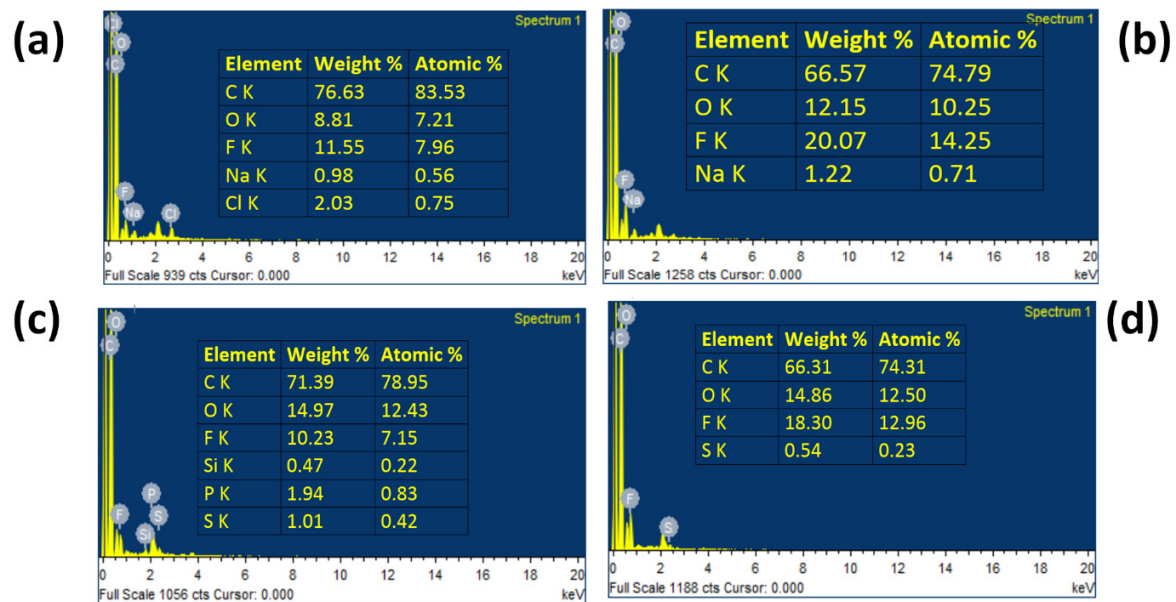

**Figure S1:** EDS elemental composition of the fabricated free standing electrodes (a) 5%, (b) 7.5%, (c) 10% and (d) 12.5% of PVDF concentration.

## Texture Properties of commercial activated carbon

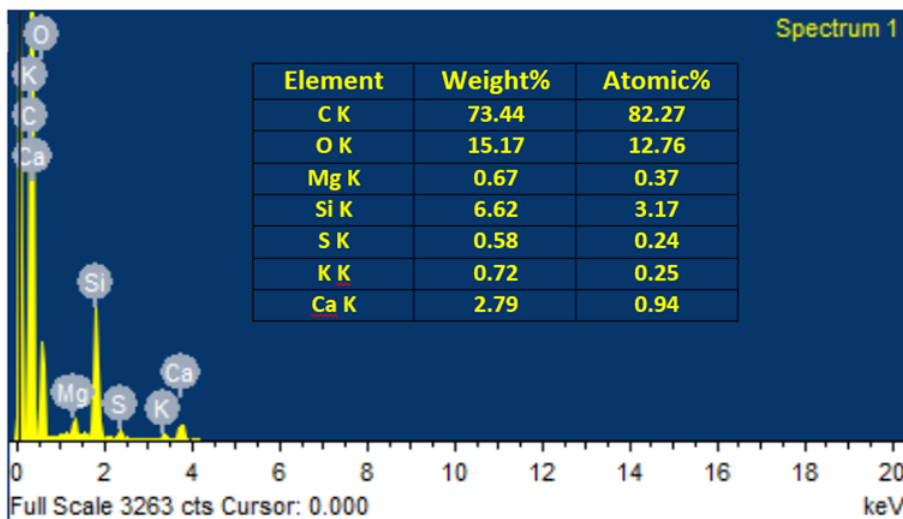

**Figure S2:** EDS analysis of commercial activated carbon used to prepare the free standing electrode.

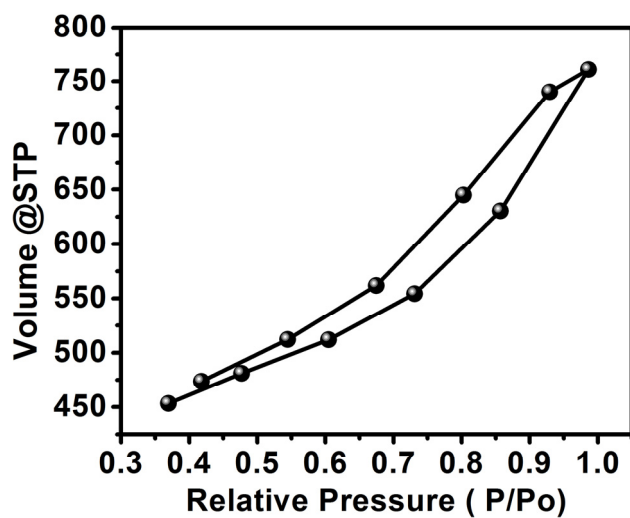

**Figure S3:** BET analysis of commercial activated carbon used to prepare the free standing electrode.

**Table S1:** Surface area analysis of commercial activated carbon used to prepare the free standing electrode.

| SBET<br>(m <sup>2</sup> g <sup>-1</sup> ) | V <sub>total</sub><br>(cm <sup>3</sup> g <sup>-1</sup> ) | V <sub>micro</sub><br>(cm <sup>3</sup> g <sup>-1</sup> ) | poreave<br>(nm) | V <sub>total</sub><br>(cm <sup>3</sup> g <sup>-1</sup> ) |
|-------------------------------------------|----------------------------------------------------------|----------------------------------------------------------|-----------------|----------------------------------------------------------|
| 1250                                      | 0.53                                                     | 0.78                                                     | 3.33            | 0.98                                                     |
